# Supplementary material for: The role of particle-to-cell interactions in dictating nanoparticle aided magnetophoretic separation of microalgal cells
Source: Royal Society of Chemistry journal article supplement (doi:10.1039/c4nr03121k), 2014-01-01
Supplement: c4nr03121k1.pdf [file c4nr03121k1.pdf]

**Supporting Information:**

**The Role of Particle-to-Cell Interactions in Dictating the Nanoparticle Aided Magnetophoretic Separation of Microalgal Cell**

Pey Yi Toh<sup>a</sup>, Bee Wah Ng<sup>a,b</sup>, Abdul Latif Ahmad<sup>a</sup>, Derek Juinn Chieh Chan<sup>a</sup>, JitKang Lim<sup>a,c\*</sup>

<sup>a</sup>School of Chemical Engineering, Universiti Sains Malaysia, Nibong Tebal, Penang 14300, Malaysia.

<sup>b</sup>School of Biological Sciences, Universiti Sains Malaysia, Minden, Penang 11800, Malaysia.

<sup>c</sup>Department of Physics, Carnegie Mellon University, Pittsburgh, PA 15213, USA.

\*To whom correspondence should be addressed:

JitKang Lim  
School of Chemical Engineering  
Universiti Sains Malaysia  
Nibong Tebal, Penang 14300  
Malaysia  
e-mail: [chj itkangl@usm.my](mailto:chj itkangl@usm.my)  
Tel: 604-599-6423  
Fax: 604-594-1013

Table S1. Contact angle measurements of *Chlorella* sp., bare-IONPs, SF-IONPs and the *Nannochloropsis* sp in three different liquid.

| Surface                    | Contact Angle (°) |            |                    |
|----------------------------|-------------------|------------|--------------------|
|                            | Water             | Glycerol   | 1-Bromonaphthalene |
| <i>Chlorella</i> sp.       | 42.7 ± 1.7        | 85.1 ± 0.7 | 65.5 ± 4.9         |
| Bare-IONPs                 | 7.4 ± 0.9         | 49.5 ± 2.7 | 8.2 ± 0.2          |
| SF-IONPs                   | 12.5 ± 0.9        | 40.5 ± 2.6 | 11.6 ± 1.1         |
| <i>Nannochloropsis</i> sp. | 17.0 ± 1.1        | 50.7 ± 1.1 | 57.6 ± 1.9         |

Table S2. Surface energy components of the liquids that used for contact angle measurements to predict the Hamaker constant of two interacting surfaces.

|                    | Surface Energy (mJ/m <sup>2</sup> ) |                      |                      |                   |                    |
|--------------------|-------------------------------------|----------------------|----------------------|-------------------|--------------------|
|                    | $\gamma^{\text{tot}}$               | $\gamma^{\text{LW}}$ | $\gamma^{\text{AB}}$ | $\gamma^{\oplus}$ | $\gamma^{\ominus}$ |
| Water              | 72.8                                | 21.8                 | 51.0                 | 25.5              | 25.5               |
| Glycerol           | 64.0                                | 34                   | 30.0                 | 3.92              | 57.4               |
| 1-Bromonaphthalene | 44.4                                | 44.4                 | 0                    | 0                 | 0                  |

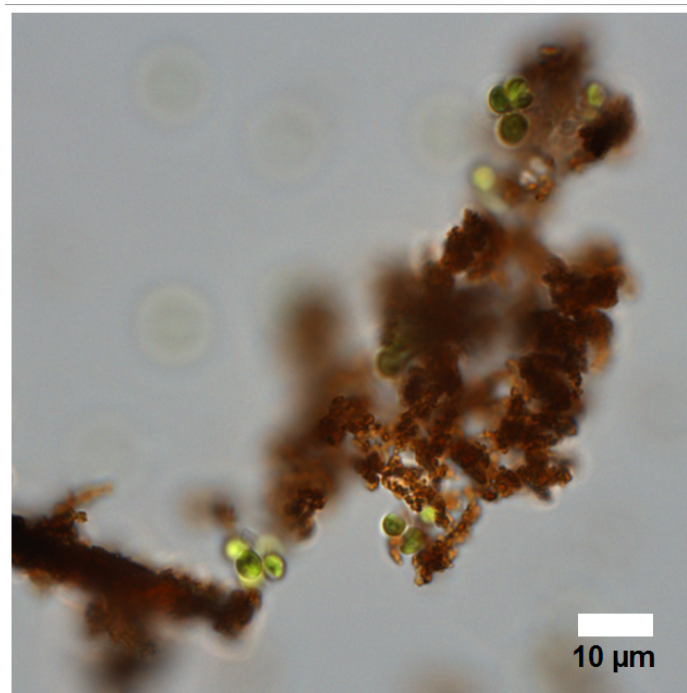

Figure S1. Optical microscopy image show some of the *Chlorella* sp. cells are trapped inside the flocculated bare-IONPs matrix after introduced the permanent magnet NdFeB.

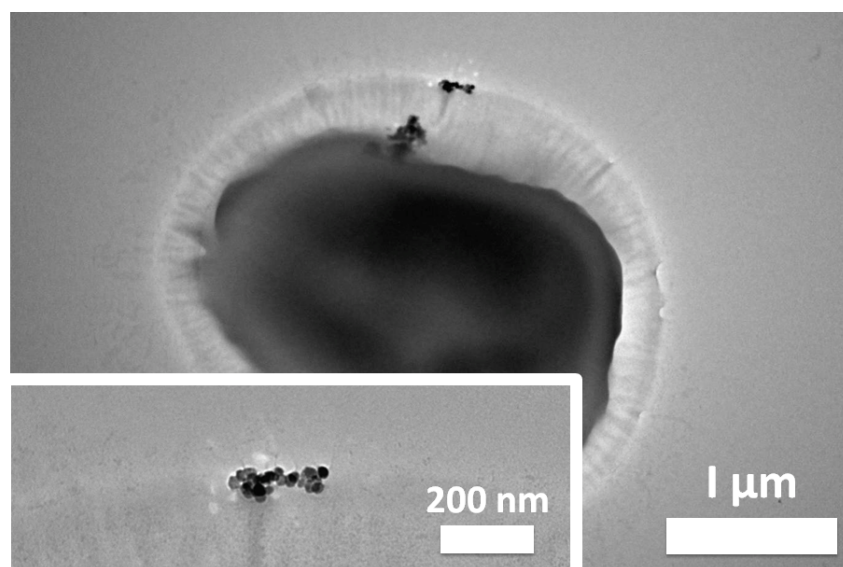

Figure S2. Transmission electron microscopy (TEM) micrograph shows relatively small size of the IONPs with respect to the *Chlorella* sp. cell surface. The cell surface is assumed to be a flat surface for the interaction with IONPs.

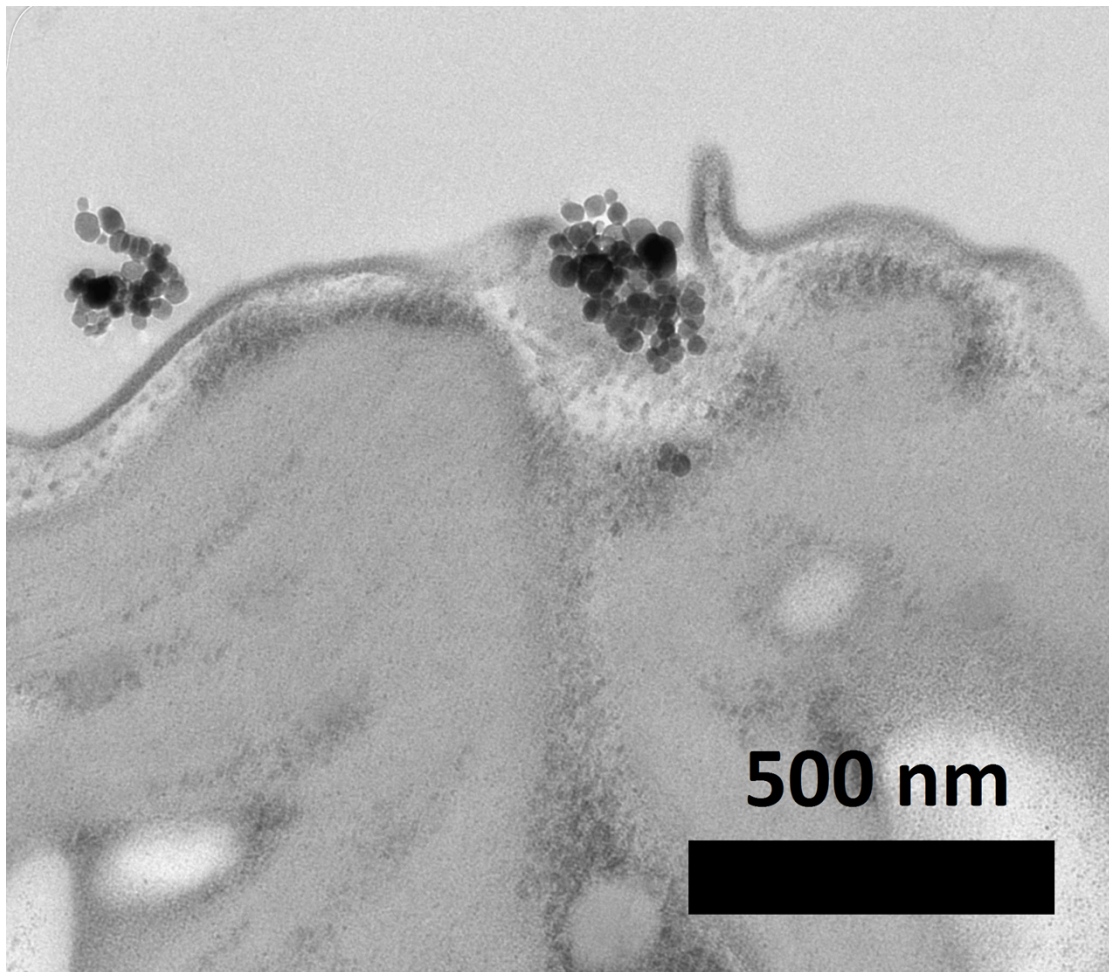

Figure S3. TEM micrograph shows the successfully attachment of the SF-IONPs (positive charge) onto the cell membrane (net negative charge) of *Chlorella* sp. through the ES attraction. Coincidentally, this micrograph has also revealed the internalization of SF-IONPs into the microalgal cell.

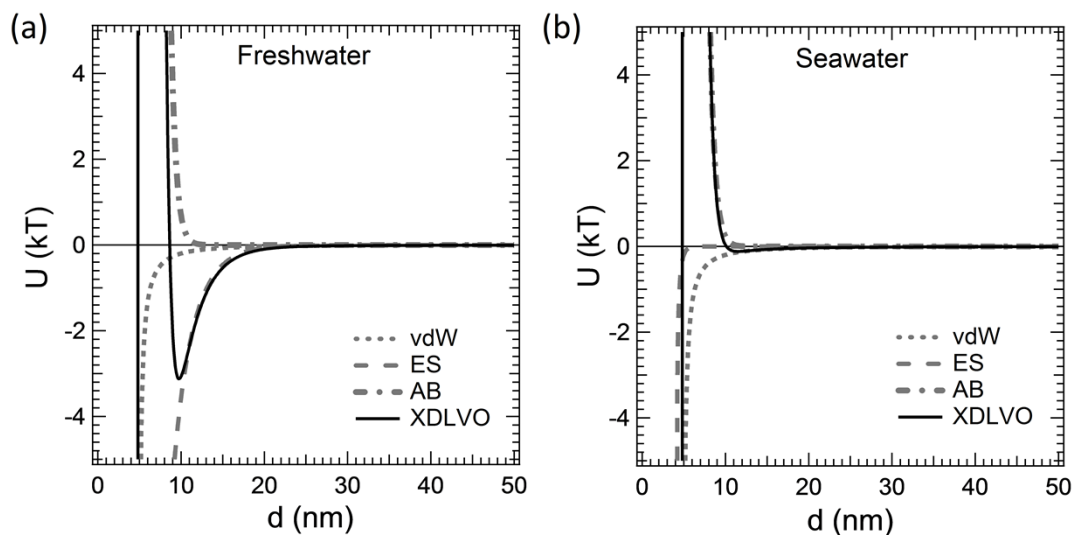

Figure S4. The XDLVO profile for the interaction between the *Chlorella* sp. cells and the SF-IONPs in (a) freshwater and (b) seawater.

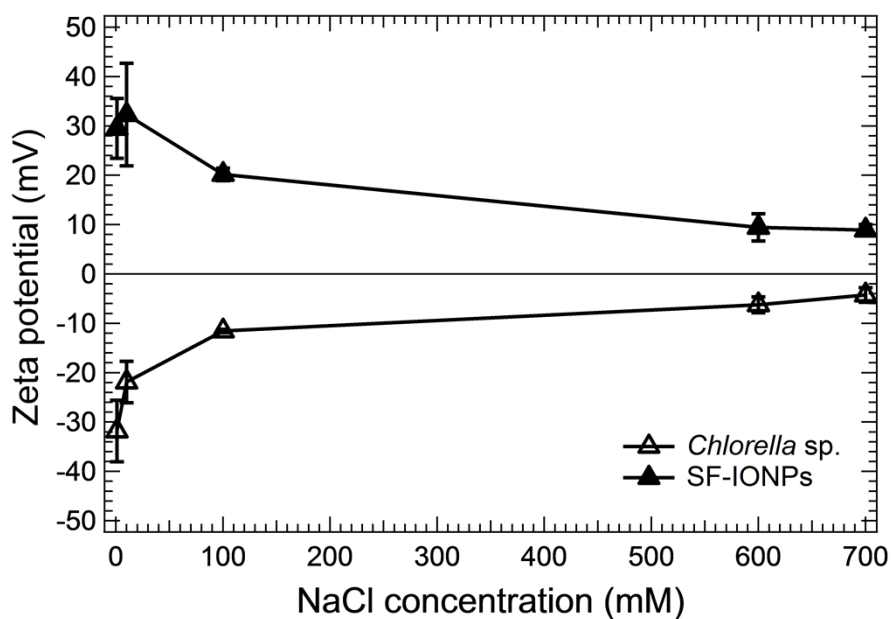

Figure S5. Zeta potential of *Chlorella* sp. and SF-IONPs with respect to NaCl concentration.

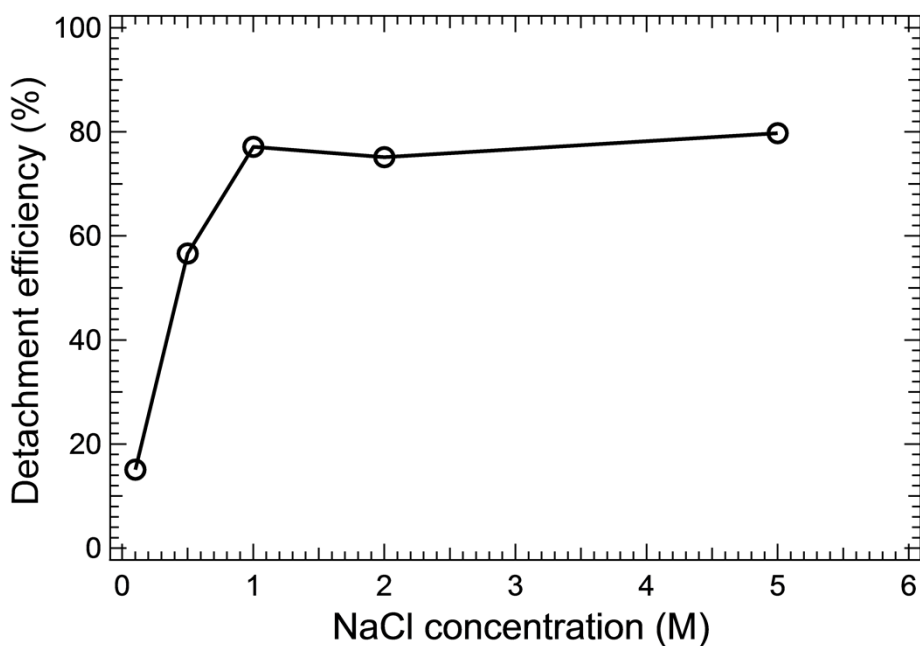

Figure S6. Detachment efficiency of *Chlorella* sp. cells from the SF-IONPs-attached-cells biomass in different concentration of NaCl.

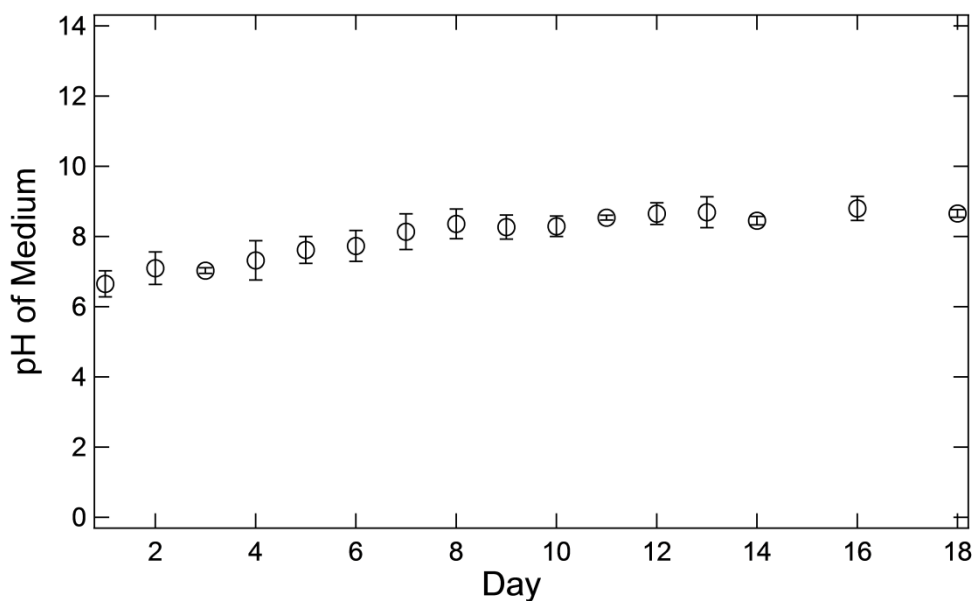

Figure S7. The solution pH of the *Chlorella* sp. culture medium has increased slightly within the culturing period. The range of pH fluctuation can be observed between pH 6 to pH 9. (Reference: Toh, P. Y.; Ng, B. W.; Ahmad, A. L.; Derek, C. J. C.; Lim, J. K. Magnetophoretic separation of *Chlorella* sp.: Role of cationic polymer binder. *Process Saf. Environ.* **2014**, <http://dx.doi.org/10.1016/j.psep.2014.03.010>.)

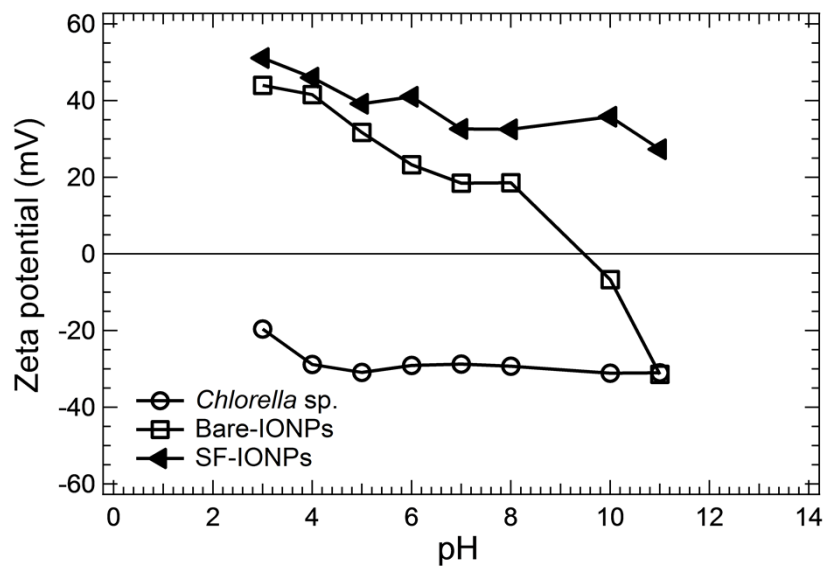

Figure S8. Zeta-potential of *Chlorella* sp., bare-IONPs and SF-IONPs as a function of solution pH.

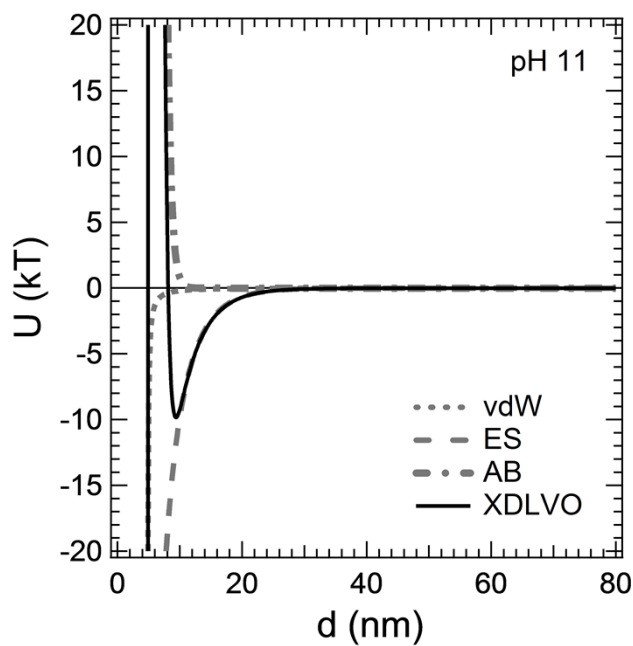

Figure S9. Potential energy profiles of vdW, ES, AB and XDLVO as a function of distance for the case of *Chlorella* sp. cells and SF-IONPs at pH 11.

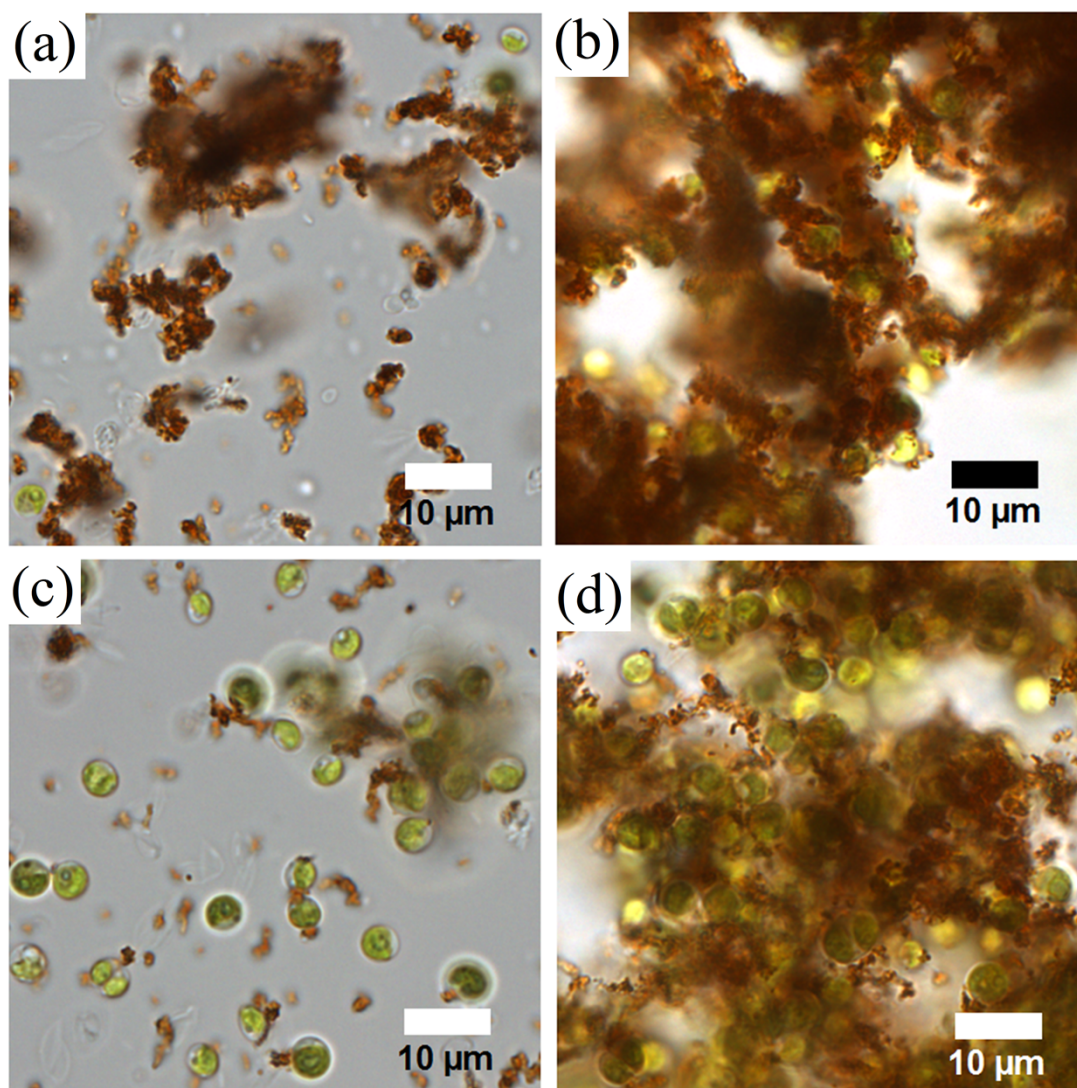

Figure S10. Bare-IONPs with particle-to-cell ratio of (a)  $0.42 \text{ g g}^{-1}$  and (b)  $2.11 \text{ g g}^{-1}$ , and SF-IONPs at with particle-to-cell ratio of (c)  $0.21 \text{ g g}^{-1}$  and (d)  $0.42 \text{ g g}^{-1}$  for the case of *Nannochloropsis* sp.. At the same particle-to-cell ratio of  $0.42 \text{ g g}^{-1}$  considerable seeding of SF-IONPs on microalgal cell can be observed but most of the bare-IONPs self-aggregated to form large clusters.



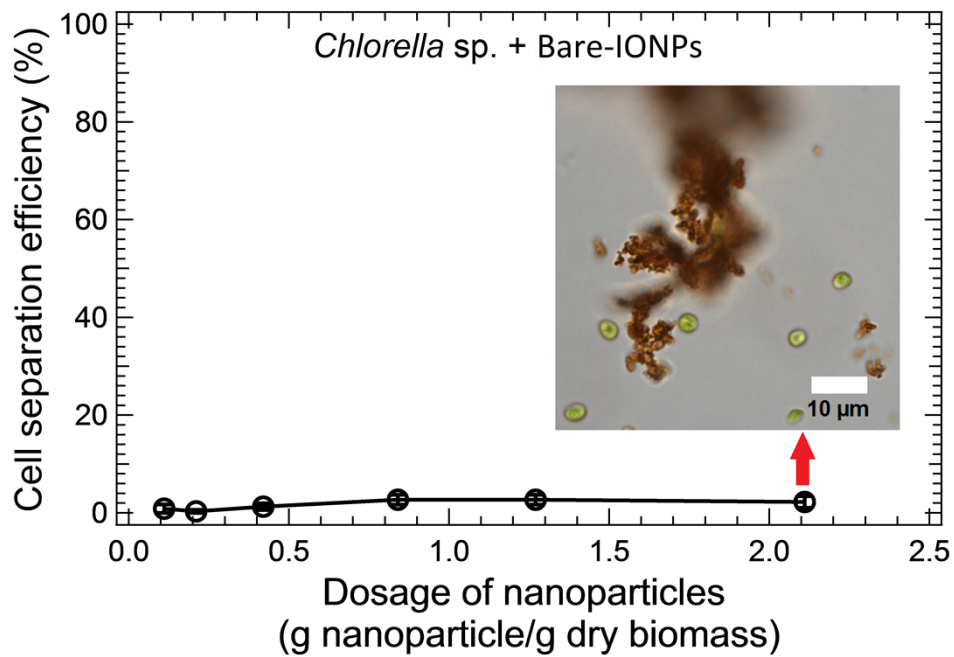

Figure S11. Magnetophoretic *Chlorella* sp. cell separation efficiency in different dosage of bare-IONPs. Microscopy image attached showed that there is no effective attachment between the cells and bare-IONPs even at high dosage of 2.11 g nanoparticles/g dry biomass.
